# Supplementary material for: Attitudes towards animal study registries and their characteristics: An online survey of three cohorts of animal researchers
Source: PLOS journal article supplement (doi:10.1371/journal.pone.0226443), 2020-01-06
Supplement: S3 (10.1371/journal.pone.0226443.s003) [file journal.pone.0226443.s003]

## Supplement 3. Demographic data

Table A: Gender

| Sample       | Gender                 | Female       | Male         | Total         |
|--------------|------------------------|--------------|--------------|---------------|
| CAMARADES    | Number                 | 58           | 48           | 106           |
|              | % within sample        | 54.7%        | 45.3%        | 100.0%        |
| Random       | Number                 | 98           | 157          | 255           |
|              | % within sample        | 38.4%        | 61.6%        | 100.0%        |
| Journal      | Number                 | 9            | 38           | 47            |
|              | % within sample        | 19.1%        | 80.9%        | 100.0%        |
| <b>Total</b> | <b>Number</b>          | <b>164</b>   | <b>243</b>   | <b>408</b>    |
|              | <b>% within sample</b> | <b>40.3%</b> | <b>59.7%</b> | <b>100.0%</b> |

Missing: n=5

Table B: Age

| Sample       | Number     | Mean         | SD            | Median       |
|--------------|------------|--------------|---------------|--------------|
| CAMARADES    | 107        | 39.92        | 11.647        | 39.00        |
| Random       | 256        | 48.58        | 11.113        | 47.00        |
| Journal      | 47         | 49.09        | 11.407        | 44.00        |
| <b>Total</b> | <b>409</b> | <b>46.38</b> | <b>11.899</b> | <b>45.00</b> |

Missing: n=3

Table C: Years since completion of highest degree

| Sample       | Years since completion of highest degree | 0-9          | 10-24        | ≥ 25         | Total         |
|--------------|------------------------------------------|--------------|--------------|--------------|---------------|
| CAMARADES    | Number                                   | 60           | 36           | 11           | 107           |
|              | % within sample                          | 56.1%        | 33.6%        | 10.3%        | 100.0%        |
| Random       | Number                                   | 59           | 126          | 74           | 259           |
|              | % within sample                          | 22.8%        | 48.6%        | 28.6%        | 100.0%        |
| Journal      | Number                                   | 7            | 24           | 16           | 47            |
|              | % within sample                          | 14.9%        | 51.1%        | 34.0%        | 100.0%        |
| <b>Total</b> | <b>Number</b>                            | <b>126</b>   | <b>185</b>   | <b>101</b>   | <b>413</b>    |
|              | <b>% within sample</b>                   | <b>30.6%</b> | <b>44.9%</b> | <b>24.5%</b> | <b>100.0%</b> |

Missing: n=0

Table D: Academic ranks

| <b>Sample</b> | <b>Academic rank</b>   | <b>Pregraduate (Bachelor/ master student)</b> | <b>Post graduate / PhD student</b> | <b>Postdoc/ assistant professor</b> | <b>Associate/ full professor</b> | <b>Total</b>  |
|---------------|------------------------|-----------------------------------------------|------------------------------------|-------------------------------------|----------------------------------|---------------|
| CAMARADES     | Number                 | 6                                             | 28                                 | 28                                  | 35                               | 97            |
|               | % within sample        | 6.2%                                          | 28.9%                              | 28.9%                               | 36.1%                            | 100.0%        |
| Random        | Number                 | 0                                             | 8                                  | 81                                  | 165                              | 254           |
|               | % within sample        | 0.0%                                          | 3.1%                               | 31.9%                               | 65.0%                            | 100.0%        |
| Journal       | Number                 | 1                                             | 0                                  | 6                                   | 38                               | 45            |
|               | % within sample        | 2.2%                                          | 0.0%                               | 13.3%                               | 84.4%                            | 100.0%        |
| <b>Total</b>  | <b>Number</b>          | <b>7</b>                                      | <b>36</b>                          | <b>115</b>                          | <b>237</b>                       | <b>396</b>    |
|               | <b>% within sample</b> | <b>1.8%</b>                                   | <b>9.1%</b>                        | <b>29.1%</b>                        | <b>60.0%</b>                     | <b>100.0%</b> |

Missing: n=17

Table E: Type of current employer

| <b>Sample</b> | <b>Current employer</b> | <b>Academic Institution</b> | <b>Government</b> | <b>Non-Profit Organization</b> | <b>Private Industry</b> | <b>Total</b>  |
|---------------|-------------------------|-----------------------------|-------------------|--------------------------------|-------------------------|---------------|
| CAMARADES     | Number                  | 89                          | 8                 | 4                              | 5                       | 106           |
|               | % within sample         | 84.0%                       | 7.5%              | 3.8%                           | 4.7%                    | 100.0%        |
| Random        | Number                  | 229                         | 15                | 7                              | 5                       | 26            |
|               | % within sample         | 89.5%                       | 5.9%              | 2.7%                           | 2.0%                    | 100.0%        |
| Journal       | Number                  | 42                          | 2                 | 2                              | 1                       | 47            |
|               | % within sample         | 89.4%                       | 4.3%              | 4.3%                           | 2.1%                    | 100.0%        |
| <b>Total</b>  | <b>Number</b>           | <b>359</b>                  | <b>25</b>         | <b>13</b>                      | <b>11</b>               | <b>409</b>    |
|               | <b>% within sample</b>  | <b>88.0%</b>                | <b>6.1%</b>       | <b>3.2%</b>                    | <b>2.7%</b>             | <b>100.0%</b> |

Missing: n=4

Table F: Articles in last three years

| <b>Sample</b> | <b>Articles published</b> | <b>0</b>    | <b>1-2</b>   | <b>3-10</b>  | <b>More than 10</b> | <b>Total</b>  |
|---------------|---------------------------|-------------|--------------|--------------|---------------------|---------------|
| CAMARADES     | Number                    | 31          | 30           | 36           | 9                   | 106           |
|               | % within sample           | 29.2%       | 28.3%        | 34.0%        | 8.5%                | 100.0%        |
| Random        | Number                    | 2           | 34           | 131          | 92                  | 259           |
|               | % within sample           | 0.8%        | 13.1%        | 50.6%        | 35.5%               | 100.0%        |
| Journal       | Number                    | 0           | 5            | 19           | 23                  | 47            |
|               | % within sample           | 0.0%        | 10.6%        | 40.4%        | 48.9%               | 100.0%        |
| <b>Total</b>  | <b>Number</b>             | <b>33</b>   | <b>69</b>    | <b>186</b>   | <b>123</b>          | <b>412</b>    |
|               | <b>% within sample</b>    | <b>8.0%</b> | <b>16.8%</b> | <b>45.3%</b> | <b>29.9%</b>        | <b>100.0%</b> |

Missing: n=1

Table G: Funding in last three years

| <b>Sample</b> | <b>Articles published</b> | <b>0/ no applicable grants</b> | <b>Less than \$50,000 (€48,000)</b> | <b>\$50,000 - \$499,999 (€48,000 - €480,699)</b> | <b>\$500,000 - \$999,999 (€480,700 - €961,399)</b> | <b>\$1,000,000 - \$4,999,999 (€961,400 - €4,806,999)</b> | <b>More than \$5,000,000 (€4,807,000)</b> | <b>Total</b>  |
|---------------|---------------------------|--------------------------------|-------------------------------------|--------------------------------------------------|----------------------------------------------------|----------------------------------------------------------|-------------------------------------------|---------------|
| CAMARADES     | Number                    | 56                             | 11                                  | 21                                               | 5                                                  | 4                                                        | 1                                         | 98            |
|               | % within sample           | 57.1%                          | 11.2%                               | 21.4%                                            | 5.1%                                               | 4.1%                                                     | 1.0%                                      | 100.0%        |
| Random        | Number                    | 33                             | 50                                  | 88                                               | 44                                                 | 23                                                       | 2                                         | 240           |
|               | % within sample           | 13.8%                          | 20.8%                               | 36.7%                                            | 18.3%                                              | 9.6%                                                     | 0.8%                                      | 100.0%        |
| Journal       | Number                    | 6                              | 3                                   | 11                                               | 8                                                  | 15                                                       | 2                                         | 45            |
|               | % within sample           | 13.3%                          | 6.7%                                | 24.4%                                            | 17.8%                                              | 33.3%                                                    | 4.4%                                      | 100.0%        |
| <b>Total</b>  | <b>Number</b>             | <b>95</b>                      | <b>64</b>                           | <b>119</b>                                       | <b>57</b>                                          | <b>42</b>                                                | <b>5</b>                                  | <b>383</b>    |
|               | <b>% within sample</b>    | <b>24.9%</b>                   | <b>16.8%</b>                        | <b>31.2%</b>                                     | <b>14.9%</b>                                       | <b>11.0%</b>                                             | <b>1.3%</b>                               | <b>100.0%</b> |

Missing: n=30

Table H: Type of research

| Sample    | Focus of research | Basic only | Mainly basic | About equal | Mainly preclinical | Preclinical only | Total  |
|-----------|-------------------|------------|--------------|-------------|--------------------|------------------|--------|
| CAMARADES | Number            | 24         | 23           | 20          | 21                 | 11               | 99     |
|           | % within sample   | 24.2%      | 23.2%        | 20.2%       | 21.2%              | 11.1%            | 100.0% |
| Random    | Number            | 39         | 81           | 61          | 61                 | 17               | 259    |
|           | % within sample   | 15.1%      | 31.3%        | 23.6%       | 23.6%              | 6.6%             | 100.0% |
| Journal   | Number            | 8          | 20           | 11          | 7                  | 1                | 47     |
|           | % within sample   | 17.0%      | 42.6%        | 23.4%       | 14.9%              | 2.1%             | 100.0% |
| Total     | Number            | 71         | 124          | 91          | 89                 | 29               | 405    |
|           | % within sample   | 17.6%      | 30.7%        | 22.5%       | 22.0%              | 7.2%             | 100.0% |

Missing: n=8
